# Supplementary material
Source: PubMed Central journal article supplement (PMC5235356)
Supplement: NIHMS837376-supplement-1.pdf [file NIHMS837376-supplement-1.pdf]

**Supplemental Information for Fachinetti, Logsdon et al.**

**Supplemental Inventory**

1. Supplemental Figure Legends
2. Supplemental Figures
